# Supplementary material for: A novel mechanism of bulk cytoplasmic transport by cortical dynein in Drosophila ovary
Source: eLife journal article supplement (doi:10.7554/elife.75538), 2022-02-16
Supplement: fig5-data1 [file Figure 5-source data 1 legend.docx]

Figure 5-source data 1 contains the original raw pulldown blot (1) and labeled pulldown blot (2), corresponding to the pulldown blot shown in Figure 5B.
